# Supplementary material for: Solution-based fabrication of ZnO/ZnSe heterostructure nanowire arrays for solar energy conversion
Source: Royal Society of Chemistry journal article supplement (doi:10.1039/c1jm14014k), 2011-01-01
Supplement: c1jm14014k.pdf [file c1jm14014k.pdf]

## Electronic Supplementary Information (ESI)

### Solution-based fabrication of ZnO/ZnSe heterostructure nanowire arrays for solar energy conversion

Seungho Cho, Ji-Wook Jang, Sang-Hoon Lim, Hyun Joon Kang, Shi-Woo Rhee, Jae Sung Lee\* and Kun-Hong Lee \*

Department of Chemical Engineering, Pohang University of Science and Technology (POSTECH), San 31, Hyoja-Dong, Nam-Gu, Pohang, Gyungbuk, Korea, 790-784

\*Corresponding authors: E-mail: [jlee@postech.ac.kr](mailto:jlee@postech.ac.kr) (J.S.L.); [ce20047@postech.ac.kr](mailto:ce20047@postech.ac.kr) (K.-H.L.)

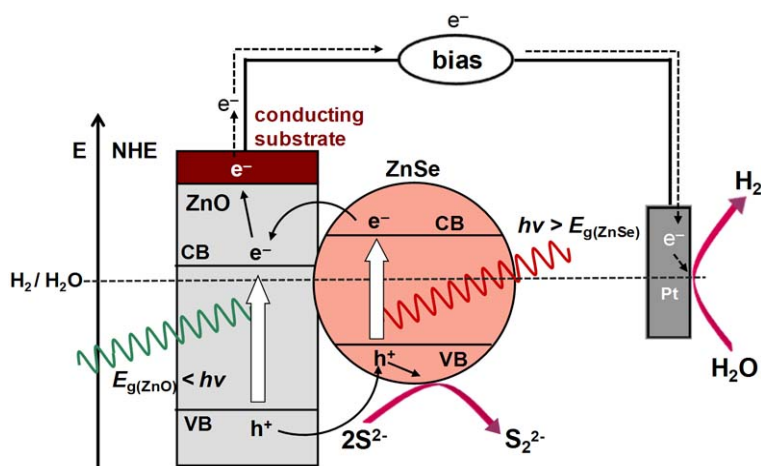

**Figure S1.** Schematic diagram showing the energy band structures of a ZnO/ZnSe heterostructure in photoelectrochemical water splitting.
